# Supplementary material for: Mechanoepigenetic regulation of extracellular matrix homeostasis via Yap and Taz
Source: PubMed Central journal article supplement — Proc Natl Acad Sci U S A. 2023 May 22;120(22):e2211947120. doi: 10.1073/pnas.2211947120 (PMC10235980; doi:10.1073/pnas.2211947120), 2023-05-22
Supplement: pnas.2211947120.sapp.pdf [file pnas.2211947120.sapp.pdf]

## **Supporting Information for** Mechano-epigenetic regulation of extracellular matrix homeostasis via Yap and Taz

Dakota L. Jones, Grey F. Hallström, Xi Jiang, Ryan C. Locke, Mary Kate Evans, Edward D. Bonnevie, Anjana Srikumar, Thomas P. Leahy, Madhura P. Nijsure, Joel D. Boerckel, Robert L. Mauck, Nathaniel A. Dymant

Robert L. Mauck & Nathaniel A. Dymant

Email: [lemauck@pennmedicine.upenn.edu](mailto:lemauck@pennmedicine.upenn.edu) & [dymant@pennmedicine.upenn.edu](mailto:dymant@pennmedicine.upenn.edu)

### **This PDF file includes:**

Figures S1 to S5

Tables S1

Legends for Datasets S1 to S2

### **Other supporting materials for this manuscript include the following:**

Datasets S1 to S2

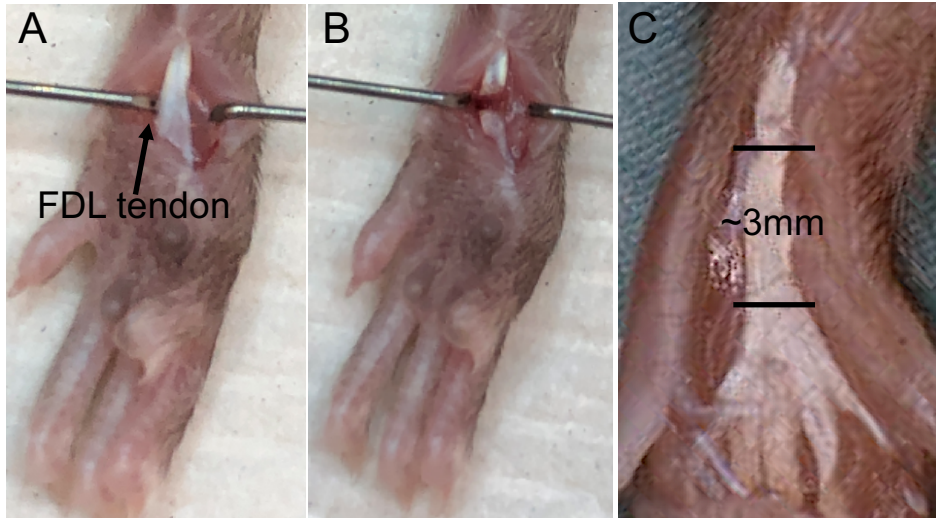

**Supplemental Figure 1: FDL tendon resection surgery.**

While the animal was lying in a prone position with the ankle in plantar flexion, the distal region of the FDL tendon was accessed via an incision through the palmar region of the paw (A). The tendon was gripped and cut using scissors, resulting in ~3mm of tendon being removed just proximal to the bifurcation point (B). Panel C is from another animal and had the skin reflected further to demonstrate the ~3 mm region of the FDL that removed. For clarity, these images were taken on a cadaveric specimen. However, in live animals, the proximal tendon region significantly retracted following resection.

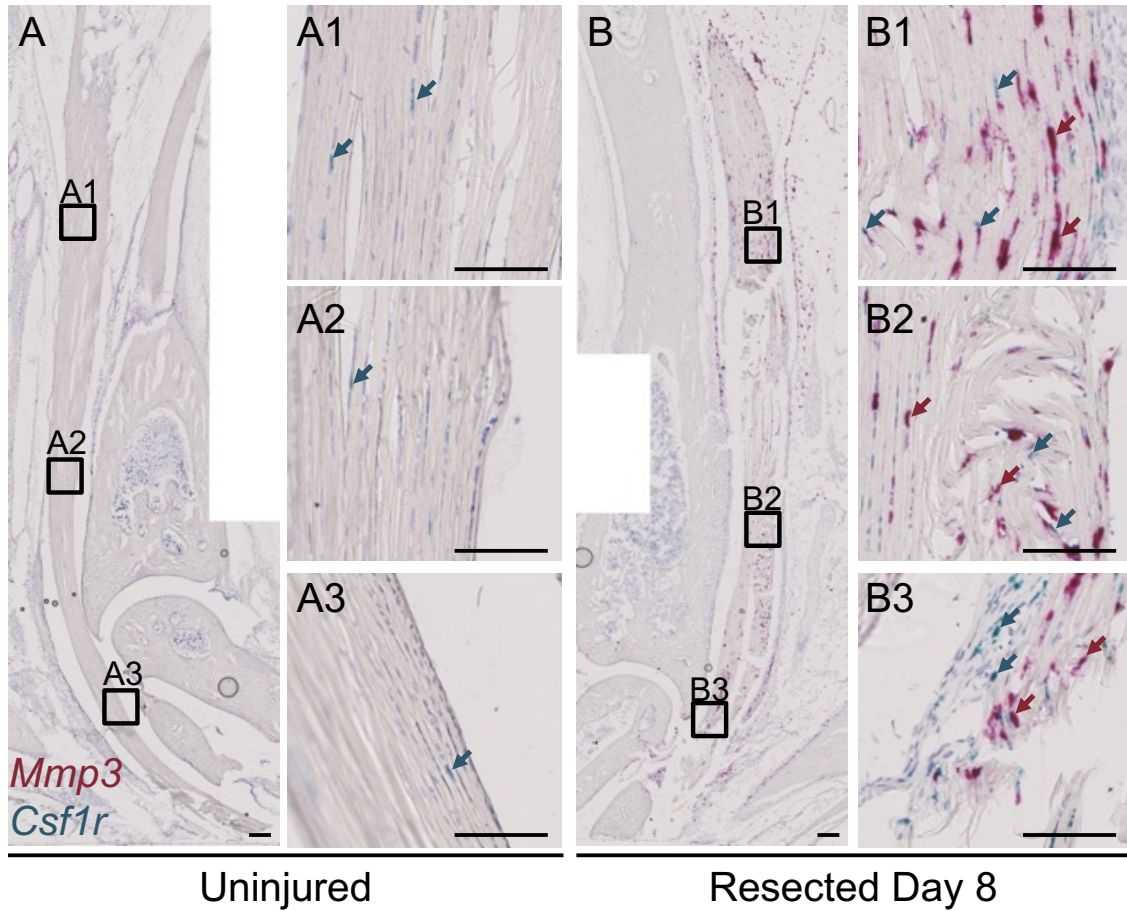

**Supplemental Figure 2: Myeloid cells are not the primary source of Mmp3 expression in the FDL tendon.**

Representative images of RNAscope duplex in situ hybridization staining for Mmp3 (red) and Csf1r (teal) in contralateral uninjured (A) and resected FDL tendons (B) on day 8 following resection. The vast majority of Mmp3 expression is by fibroblastic cells that do not express Csf1r, which is a myeloid cell marker.

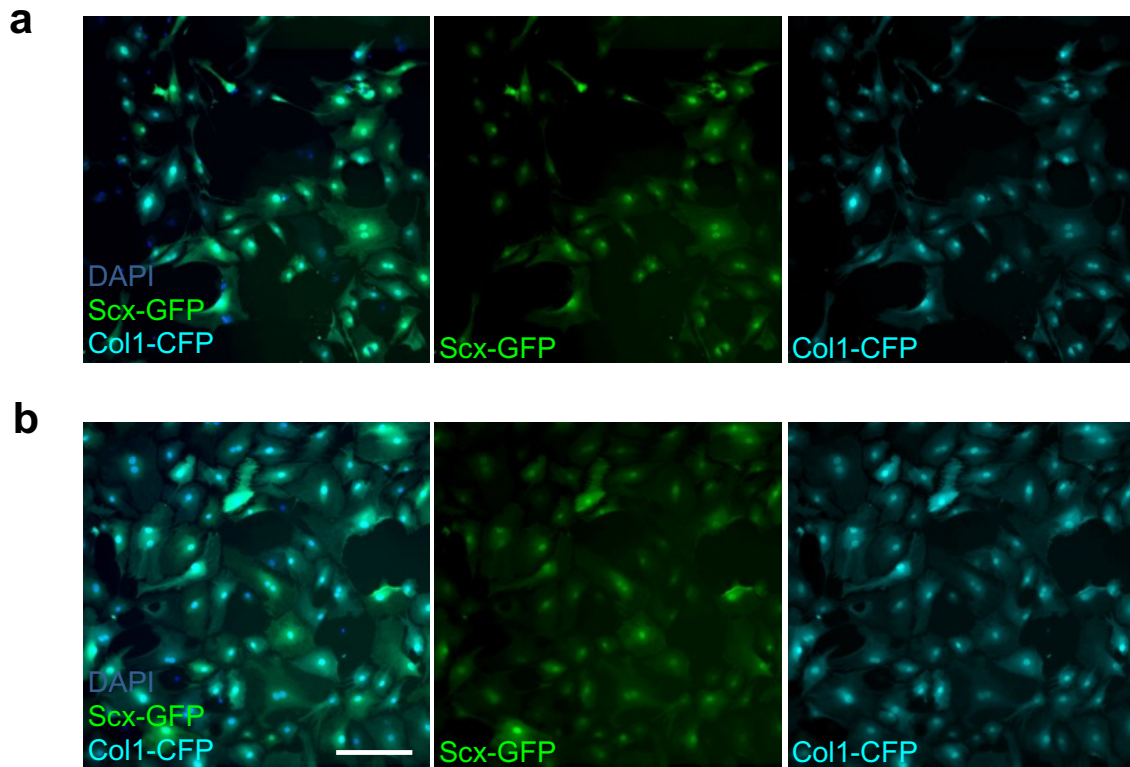

**Supplemental Figure 3: Cells isolated from tail tendon digests predominantly express tendon fibroblast reporters.**

Representative images from two separate tail tendon cell cultures at passage 0 from the Scx-GFP;Col1a1-CFP dual reporter mouse line. Both Scx-GFP and Col1a1-CFP are abundantly expressed by tendon fibroblasts and nearly all the cells express both reporters. These cultures were created using the same isolation protocol as the CD1 and YAP-CA mouse lines reported in this paper. Scale bar is 100  $\mu$ m.

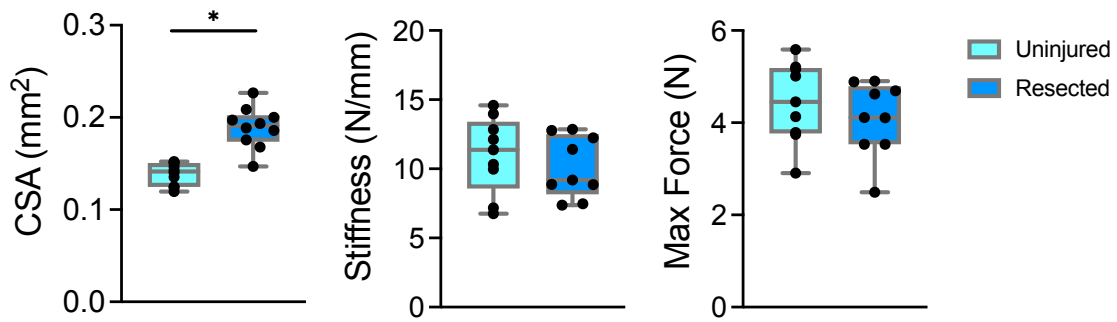

**Supplemental Figure 4: Structural properties of FDL tendons following resection.**

Viscoelastic and uniaxial failure tests were conducted on FDL tendons at day 8 post-resection. The cross-sectional area was higher in the resected tendons compared to contralateral controls while the stiffness and maximum force were not different from one another (n=9). \*P<0.05 evaluated by paired t-test. Error bars represent standard deviation.

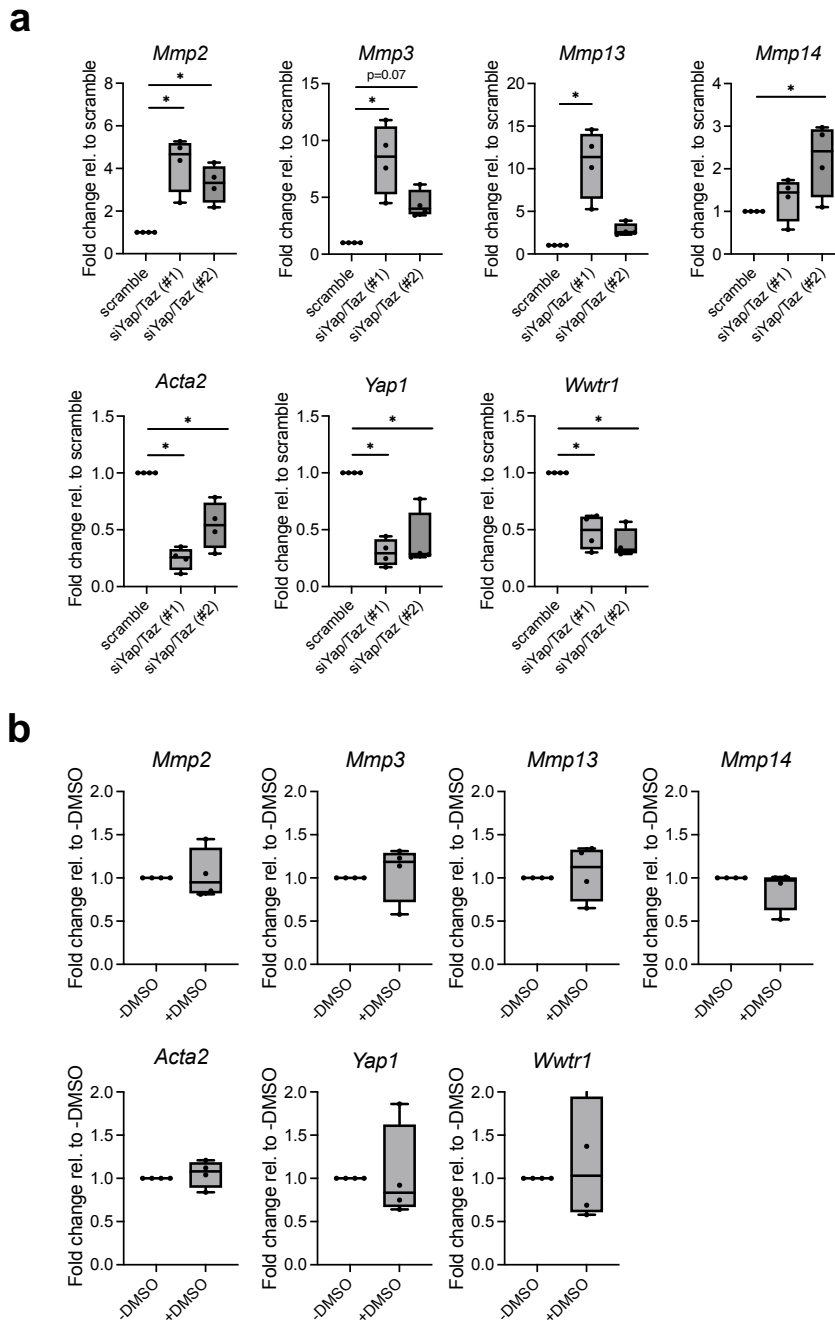

**Supplemental Figure 5: Validation of siRNA targeting Yap/Taz and effect of DMSO on target gene expression**

(a) qRT-PCR analysis of mouse tendon fibroblasts following administration of siRNA targeting Yap and Taz for 3 days. Each group indicates a different single siRNA oligo targeting both Yap and Taz (n=4). \*p<0.05 evaluated by unpaired t-test. Error bars represent standard deviation. (b) qRT-PCR analysis of mouse tendon fibroblasts following administration of DMSO for 24 hours. (n=4). No comparisons reached statistical significance, evaluated by unpaired t-test. Error bars represent standard deviation.

**Table S1: Primer sequences used for qRT-PCR.**

| Gene Name | Direction | Sequence                 |
|-----------|-----------|--------------------------|
| Gapdh     | Forward   | GTGGAGTCATACTGGAACATGTAG |
|           | Reverse   | AATGGTGAAGGTCGGTGTG      |
| Col1a1    | Forward   | CCTCAGGGTATTGCTGGACAAC   |
|           | Reverse   | CAGAAGGACCTTGTTTGCCAGG   |
| Acta2     | Forward   | GTCCCAGACATCAGGGAGTAA    |
|           | Reverse   | TCGGATACTTCAGCGTCAGGA    |
| Cyr61     | Forward   | CTGCGCTAAACAACCTCAACGA   |
|           | Reverse   | GCAGATCCCTTTCAGAGCGG     |
| Mmp13     | Forward   | CTTCTTCTTGTTGAGCTGGACTC  |
|           | Reverse   | CTGTGGAGGTCACTGTAGACT    |
| Mmp14     | Forward   | CAGTATGGCTACCTACCTCCAG   |
|           | Reverse   | GCCTTGCCTGTCACTTGTAAG    |
| Mmp3      | Forward   | ACATGGAGACTTTGTCCCTTTTG  |
|           | Reverse   | TTGGCTGAGTGGTAGAGTCCC    |

**Dataset S1: Gene ontology analysis from genes downregulated from blebbistatin treatment.**

**Dataset S2: Gene ontology analysis from genes upregulated from blebbistatin treatment.**
